# Supplementary material for: Source apportionment of PM 2.5 at a regional background site in NorthChina using PMF linked with radiocarbon analysis: insight into thecontribution of biomass burning
Source: Copernicus journal article supplement (doi:10.5194/acp-16-11249-2016), 2016-09-12
Supplement: Supplementary file 1 [file acp-16-11249-2016-supplement.pdf]

Supplement of Atmos. Chem. Phys., 16, 11249–11265, 2016  
<http://www.atmos-chem-phys.net/16/11249/2016/>  
doi:10.5194/acp-16-11249-2016-supplement  
© Author(s) 2016. CC Attribution 3.0 License.

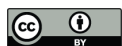

Atmospheric  
Chemistry  
and Physics  
Open Access  
EGU

*Supplement of*

## **Source apportionment of PM<sub>2.5</sub> at a regional background site in North China using PMF linked with radiocarbon analysis: insight into the contribution of biomass burning**

**Zheng Zong et al.**

*Correspondence to:* Chongguo Tian (cgtian@yic.ac.cn) and Yingjun Chen (yjchentj@tongji.edu.cn)

The copyright of individual parts of the supplement might differ from the CC-BY 3.0 licence.

5

## Test S1

Uncertainty of PMF modeling was usually estimated by bootstrapping (BS), displacement (DISP), and bootstrapping with displacement (BS-DISP). As shown in table S1, the percentage of BS factors assigned to each base case factor ranges from a low value of 93% for sea salt to a high of 100% for vehicle emission, traffic emission, industrial process, mineral dust and coal combustion; and there are no unmapped BS factors. About DISP, after strong-weighted species were displaced, no factors swaps were reported for any of the allowed  $dQ_{\max}$  examined by the model (fixed 4, 8, 16, 32 in this study). Besides, only two and one factors swaps were found for sea salt and biomass burning, respectively, for each allowed  $dQ_{\max}$  examined by modeling (fixed 0.5, 2, 4, 8 for BS-DISP analysis in this study), while no factors swaps were found in other factors. All these error estimates results were well within the range of stable solution of PMF model, demonstrating the effectiveness of the model results in this study.

20

Table S1 Percentage of BS factors assigned to each base case factor with a correlation threshold of 0.6

| Boot Factor | Vehicle emission | Traffic dust | Ship emission | Industrial process | Biomass burning | Mineral dust | Coal combustion | Sea salt | Unmapped |
|-------------|------------------|--------------|---------------|--------------------|-----------------|--------------|-----------------|----------|----------|
| 1           | 100              | 0            | 0             | 0                  | 0               | 0            | 0               | 0        | 0        |
| 2           | 0                | 100          | 0             | 0                  | 0               | 0            | 0               | 0        | 0        |
| 3           | 0                | 0            | 96            | 0                  | 4               | 0            | 0               | 0        | 0        |
| 4           | 0                | 0            | 0             | 100                | 0               | 0            | 0               | 0        | 0        |
| 5           | 0                | 0            | 0             | 0                  | 99              | 0            | 0               | 1        | 0        |
| 6           | 0                | 0            | 0             | 0                  | 0               | 100          | 0               | 0        | 0        |
| 7           | 0                | 0            | 0             | 0                  | 0               | 0            | 100             | 0        | 0        |
| 8           | 0                | 0            | 0             | 0                  | 7               | 0            | 0               | 93       | 0        |

25

30

Table S2 Statistics of PM<sub>2.5</sub> chemical components on the Qimu Island during the sampling period

| Species                       | Mean $\pm$ std.<br>( $\mu\text{g m}^{-3}$ ) | Range<br>( $\mu\text{g m}^{-3}$ ) | Species | Mean $\pm$ std.<br>( $\text{ng m}^{-3}$ ) | Range<br>( $\text{ng m}^{-3}$ ) |
|-------------------------------|---------------------------------------------|-----------------------------------|---------|-------------------------------------------|---------------------------------|
| PM <sub>2.5</sub>             | 77.6 $\pm$ 59.3                             | 12.7 – 305                        | Fe      | 408 $\pm$ 285                             | 7.12 – 1588                     |
| SO <sub>4</sub> <sup>2-</sup> | 14.2 $\pm$ 18.0                             | 1.37 – 96.2                       | Zn      | 107 $\pm$ 142                             | 5.56 – 987                      |
| NO <sub>3</sub> <sup>-</sup>  | 11.9 $\pm$ 16.4                             | 0.270 – 87.1                      | Pb      | 88.4 $\pm$ 85.7                           | 3.02 – 412                      |
| NH <sub>4</sub> <sup>+</sup>  | 3.11 $\pm$ 2.14                             | 0.610 – 10.1                      | Mn      | 29.3 $\pm$ 28.0                           | 1.38 – 108                      |
| Cl <sup>-</sup>               | 2.06 $\pm$ 1.78                             | 0.100 – 8.90                      | Cu      | 9.08 $\pm$ 11.4                           | 0.03 – 77.6                     |
| K <sup>+</sup>                | 0.961 $\pm$ 0.84                            | 0.07 – 3.95                       | Ti      | 7.72 $\pm$ 7.34                           | 0.01 – 30.7                     |
| Na <sup>+</sup>               | 0.430 $\pm$ 0.25                            | 0.05 – 1.58                       | As      | 6.61 $\pm$ 7.86                           | 0.67 – 43.4                     |
| Ca <sup>2+</sup>              | 0.379 $\pm$ 0.22                            | 0.07 – 1.32                       | Ni      | 4.28 $\pm$ 2.30                           | 1.68 – 13.8                     |
| Mg <sup>2+</sup>              | 0.03 $\pm$ 0.03                             | 0.01 – 0.17                       | V       | 3.90 $\pm$ 2.47                           | 0.450 – 12.5                    |
| OC                            | 6.85 $\pm$ 4.81                             | 0.810 – 21.3                      | Cd      | 1.82 $\pm$ 4.06                           | 0.04 – 25.9                     |
| EC                            | 4.90 $\pm$ 4.11                             | 0.800 – 19.6                      | Co      | 0.240 $\pm$ 0.180                         | 0.01 – 0.73                     |
